# Supplementary material for: Longitudinal Association of Amyloid Beta and Anxious-Depressive Symptoms in Cognitively Normal Older Adults
Source: Atypon-hosted journal article supplement (doi:10.1176/appi.ajp.2017.17040442), 2018-01-12
Supplement: appi.ajp.2017.17040442.ds001.pdf [file appi.ajp.2017.17040442.ds001.pdf]

 


Psychiatry Online
